# Supplementary material for: Can Gastric Cancer Patients with High Mandard Score Benefit from Neoadjuvant Chemotherapy?
Source: Hindawi journal article supplement (doi:10.1155/2022/8178184), 2022-03-25
Supplement: f1 [file 8178184.f1.pdf]

| Mandard score | Mandard 分组 | T   | N   | M  | survival time | Stage | 分期 | 清扫淋巴<br>结 | 阳性淋巴<br>结 |
|---------------|------------|-----|-----|----|---------------|-------|----|-----------|-----------|
| 1             | 1          | Tis | N1  | MO | 0.5           | IB    | 1  | 89        | 2         |
| 5             | 3          | T3  | N0  | MO | 106.5         | IIA   | 2  | 26        | 0         |
| 2             | 1          | T4a | N1  | MO | 15.63         | IIIA  | 3  | 10        | 2         |
| 5             | 3          | T1a | N3b | MO | 88.73         | IIIB  | 3  | 28        | 16        |
| 5             | 3          | T2  | N2  | MO | 84.8          | IIB   | 2  | 37        | 3         |
| 5             | 3          | T2  | N0  | MO | 65.6          | IB    | 1  | 46        | 0         |
| 3             | 2          | T3  | N0  | MO | 52.07         | IIA   | 2  | 20        | 0         |
| 3             | 2          | T3  | N2  | MO | 51.9          | IIIA  | 3  | 30        | 5         |
| 3             | 2          | T3  | N0  | MO | 52.03         | IIA   | 2  | 32        | 0         |
| 3             | 2          | T2  | N0  | MO | 51.97         | IB    | 1  | 51        | 0         |
| 4             | 3          | T3  | N3a | MO | 51.9          | IIIB  | 3  | 45        | 7         |
| 3             | 2          | T3  | N1  | MO | 51.2          | IIB   | 2  | 17        | 1         |
| 5             | 3          | T2  | N2  | MO | 42.53         | IIB   | 2  | 32        | 4         |
| 5             | 3          | T4b | N1  | MO | 51.47         | IIIB  | 3  | 33        | 1         |
| 3             | 2          | T2  | N2  | MO | 51.4          | IIB   | 2  | 20        | 3         |
| 1             | 1          | Tis | N1  | MO | 49.73         | IB    | 1  | 44        | 1         |
| 4             | 3          | T1b | N3b | MO | 37.57         | IIIB  | 3  | 63        | 17        |
| 1             | 1          | Tis | N1  | MO | 45.73         | IB    | 1  | 21        | 1         |
| 1             | 1          | T1b | N0  | MO | 39.5          | IA    | 1  | 23        | 0         |
| 1             | 1          | T1a | N3b | MO | 22.97         | IIIB  | 3  | 49        | 18        |
| 3             | 2          | T3  | N2  | MO | 92.43         | IIIA  | 3  | 41        | 4         |
| 5             | 3          | T3  | N2  | MO | 74            | IIIA  | 3  | 21        | 4         |
| 2             | 1          | T4b | N0  | MO | 42.6          | IIIA  | 3  | 29        | 0         |
| 5             | 3          | T4a | N1  | MO | 81.33         | IIIA  | 3  | 36        | 1         |
| 5             | 3          | T4a | N2  | MO | 13.77         | IIIA  | 3  | 40        | 6         |
| 3             | 2          | T3  | N1  | MO | 35.7          | IIB   | 2  | 20        | 2         |
| 3             | 2          | T3  | N1  | MO | 43.5          | IIB   | 2  | 17        | 1         |
| 3             | 2          | T4a | N0  | MO | 35.9          | IIB   | 2  | 27        | 0         |
| 3             | 2          | T3  | N1  | MO | 5.77          | IIB   | 2  | 58        | 2         |
| 5             | 3          | T2  | N0  | MO | 68.1          | IB    | 1  | 32        | 0         |
| 5             | 3          | T4b | N3a | MO | 4.17          | IIIC  | 3  | 38        | 15        |
| 3             | 2          | T3  | N0  | MO | 15.63         | IIA   | 2  | 21        | 0         |
| 1             | 1          | T2  | N0  | MO | 59.23         | IB    | 1  | 45        | 0         |
| 5             | 3          | T4b | N1  | MO | 24.1          | IIIB  | 3  | 20        | 2         |
| 5             | 3          | T4a | N3b | MO | 27.57         | IIIC  | 3  | 58        | 19        |
| 3             | 2          | T4a | N3b | MO | 16.33         | IIIC  | 3  | 42        | 31        |
| 2             | 1          | T4a | N3b | MO | 11.13         | IIIC  | 3  | 45        | 38        |
| 2             | 1          | T4a | N3b | MO | 14.77         | IIIC  | 3  | 37        | 31        |
| 5             | 3          | T4a | N2  | MO | 6.47          | IIIA  | 3  | 23        | 6         |
| 5             | 3          | T4a | N3b | MO | 7.8           | IIIC  | 3  | 31        | 27        |
| 3             | 2          | T4a | N1  | MO | 34.8          | IIIA  | 3  | 47        | 2         |
| 1             | 1          | T4a | N3a | MO | 9             | IIIB  | 3  | 36        | 15        |
| 5             | 3          | T4a | N3b | MO | 18.33         | IIIC  | 3  | 55        | 35        |
| 5             | 3          | T4a | N1  | MO | 17.7          | IIIA  | 3  | 26        | 1         |
| 3             | 2          | T3  | N3a | MO | 11.5          | IIIB  | 3  | 39        | 7         |
| 5             | 3          | T3  | N3b | MO | 13.5          | IIIC  | 3  | 26        | 21        |
| 5             | 3          | T3  | N3b | MO | 46            | IIIC  | 3  | 56        | 38        |
| 3             | 2          | T3  | N3a | MO | 8             | IIIB  | 3  | 21        | 10        |
| 5             | 3          | T4b | N0  | MO | 68.5          | IIIA  | 3  | 17        | 0         |

|   |       |     |    |            |   |    |    |
|---|-------|-----|----|------------|---|----|----|
| 5 | 3 T4a | N1  | MO | 24 IIIA    | 3 | 12 | 2  |
| 5 | 3 T3  | N2  | MO | 18 IIIA    | 3 | 22 | 5  |
| 5 | 3 T3  | N3b | MO | 8.6 IIIC   | 3 | 30 | 20 |
| 3 | 2 T3  | N2  | MO | 96.1 IIIA  | 3 | 38 | 6  |
| 5 | 3 T3  | N3a | MO | 10.17 IIIB | 3 | 25 | 12 |
| 5 | 3 T4a | N3b | MO | 21.8 IIIC  | 3 | 38 | 34 |
| 1 | 1 T4b | N0  | MO | 47.5 IIIA  | 3 | 37 | 0  |
| 5 | 3 T4b | N0  | MO | 16.27 IIIA | 3 | 22 | 0  |
| 5 | 3 T3  | N2  | MO | 74.87 IIIA | 3 | 41 | 5  |
| 5 | 3 T3  | N3b | MO | 54.67 IIIC | 3 | 21 | 17 |
| 5 | 3 T2  | N3a | MO | 21.5 IIIA  | 3 | 20 | 14 |
| 5 | 3 T4a | N1  | MO | 12 IIIA    | 3 | 18 | 1  |
| 3 | 2 T4a | N2  | MO | 8.43 IIIA  | 3 | 38 | 5  |
| 5 | 3 T4a | N2  | MO | 7.97 IIIA  | 3 | 13 | 6  |
| 5 | 3 T3  | N3a | M1 | 6.97 IV    | 4 | 26 | 7  |
| 5 | 3 T3  | N3a | MO | 8.8 IIIB   | 3 | 23 | 12 |
| 5 | 3 T3  | N3a | MO | 90.53 IIIB | 3 | 46 | 7  |
| 3 | 2 T3  | N3a | MO | 2.6 IIIB   | 3 | 11 | 11 |
| 2 | 1 T4a | N1  | MO | 88.1 IIIA  | 3 | 35 | 1  |
| 5 | 3 T3  | N3a | MO | 6 IIIB     | 3 | 14 | 7  |
| 3 | 2 T4a | N2  | MO | 5.53 IIIA  | 3 | 17 | 4  |
| 1 | 1 T3  | N3a | MO | 14.5 IIIB  | 3 | 17 | 7  |
| 5 | 3 T3  | N2  | MO | 86.5 IIIA  | 3 | 24 | 6  |
| 3 | 2 T4a | N1  | MO | 30.47 IIIA | 3 | 36 | 2  |
| 1 | 1 T4b | N0  | MO | 85.73 IIIA | 3 | 25 | 0  |
| 3 | 2 T2  | N3a | MO | 16.2 IIIA  | 3 | 45 | 10 |
| 3 | 2 T4b | N2  | MO | 85.5 IIIB  | 3 | 24 | 3  |
| 5 | 3 T4a | N2  | MO | 52 IIIA    | 3 | 58 | 3  |
| 5 | 3 T2  | N3a | MO | 84.8 IIIA  | 3 | 57 | 7  |
| 3 | 2 T4a | N2  | MO | 14.9 IIIA  | 3 | 16 | 4  |
| 3 | 2 T4b | N1  | MO | 82.83 IIIB | 3 | 11 | 2  |
| 1 | 1 T4a | N2  | MO | 20 IIIA    | 3 | 13 | 5  |
| 5 | 3 T4a | N3a | MO | 1.47 IIIB  | 3 | 18 | 12 |
| 3 | 2 T2  | N3a | MO | 82.13 IIIA | 3 | 18 | 9  |
| 5 | 3 T4a | N1  | MO | 5.37 IIIA  | 3 | 16 | 2  |
| 5 | 3 T4a | N3b | MO | 4.2 IIIC   | 3 | 22 | 21 |
| 5 | 3 T4a | N3b | MO | 7.5 IIIC   | 3 | 44 | 30 |
| 5 | 3 T3  | N3b | MO | 49.43 IIIC | 3 | 36 | 24 |
| 2 | 1 T4b | N0  | MO | 23.67 IIIA | 3 | 20 | 0  |
| 5 | 3 T4b | N0  | MO | 25.63 IIIA | 3 | 45 | 0  |
| 5 | 3 T3  | N2  | MO | 77.13 IIIA | 3 | 18 | 3  |
| 5 | 3 T4a | N3b | MO | 18.5 IIIC  | 3 | 32 | 16 |
| 5 | 3 T3  | N3a | MO | 38.1 IIIB  | 3 | 32 | 9  |
| 5 | 3 T4a | N3b | MO | 43.33 IIIC | 3 | 36 | 27 |
| 5 | 3 T4a | N3a | M1 | 2.63 IV    | 4 | 13 | 11 |
| 5 | 3 T4a | N1  | MO | 50.97 IIIA | 3 | 14 | 1  |
| 5 | 3 T4a | N3a | MO | 41.93 IIIB | 3 | 23 | 7  |
| 5 | 3 T4a | N1  | MO | 48 IIIA    | 3 | 15 | 2  |
| 3 | 2 T4b | N3a | MO | 50.93 IIIC | 3 | 36 | 8  |
| 5 | 3 T4a | N1  | MO | 18.37 IIIA | 3 | 26 | 1  |
| 5 | 3 T4a | N3b | MO | 16 IIIC    | 3 | 29 | 16 |
| 5 | 3 T3  | N2  | MO | 16.57 IIIA | 3 | 19 | 6  |
| 5 | 3 T3  | N3a | MO | 10.6 IIIB  | 3 | 30 | 7  |
| 5 | 3 T3  | N2  | MO | 72.3 IIIA  | 3 | 37 | 4  |

|   |       |     |    |       |      |   |    |    |
|---|-------|-----|----|-------|------|---|----|----|
| 3 | 2 T3  | N3b | MO | 38.27 | IIIC | 3 | 48 | 16 |
| 5 | 3 T3  | N3a | MO | 71.33 | IIIB | 3 | 24 | 14 |
| 5 | 3 T4a | N3b | MO | 1.33  | IIIC | 3 | 41 | 34 |
| 5 | 3 T4a | N3b | MO | 70.57 | IIIC | 3 | 52 | 22 |
| 5 | 3 T4b | N3b | MO | 4     | IIIC | 3 | 36 | 26 |
| 3 | 2 T3  | N2  | MO | 70.1  | IIIA | 3 | 57 | 6  |
| 5 | 3 T4a | N3a | MO | 6     | IIIB | 3 | 25 | 11 |
| 5 | 3 T3  | N2  | MO | 12.3  | IIIA | 3 | 38 | 4  |
| 5 | 3 T4a | N1  | MO | 17.3  | IIIA | 3 | 17 | 1  |
| 5 | 3 T4a | N3b | MO | 11.43 | IIIC | 3 | 42 | 18 |
| 5 | 3 T4b | N2  | MO | 3.3   | IIIB | 3 | 18 | 4  |
| 3 | 2 T4a | N2  | MO | 67.4  | IIIA | 3 | 24 | 4  |
| 3 | 2 T4a | N1  | MO | 65.03 | IIIA | 3 | 33 | 2  |
| 3 | 2 T3  | N2  | MO | 14.5  | IIIA | 3 | 54 | 3  |
| 5 | 3 T3  | N3a | MO | 10.6  | IIIB | 3 | 34 | 15 |
| 5 | 3 T3  | N2  | MO | 15.77 | IIIA | 3 | 21 | 4  |
| 5 | 3 T4a | N3b | MO | 2.5   | IIIC | 3 | 90 | 69 |
| 5 | 3 T4b | N3a | MO | 11.83 | IIIC | 3 | 27 | 9  |
| 5 | 3 T3  | N2  | MO | 35.5  | IIIA | 3 | 36 | 3  |
| 5 | 3 T4b | N3b | MO | 3.33  | IIIC | 3 | 41 | 39 |
| 2 | 1 T4a | N2  | MO | 44.63 | IIIA | 3 | 39 | 3  |
| 1 | 1 T4a | N3b | M1 | 18.3  | IV   | 4 | 43 | 17 |
| 5 | 3 T4a | N3b | M1 | 1.6   | IV   | 4 | 28 | 28 |
| 5 | 3 T4a | N3b | MO | 19    | IIIC | 3 | 22 | 18 |
| 1 | 1 T4b | N2  | MO | 59.97 | IIIB | 3 | 43 | 5  |
| 5 | 3 T4b | N3b | MO | 7.87  | IIIC | 3 | 53 | 23 |
| 3 | 2 T4a | N3b | MO | 23.9  | IIIC | 3 | 52 | 22 |
| 5 | 3 T3  | N3a | MO | 19.2  | IIIB | 3 | 14 | 7  |
| 5 | 3 T4a | N2  | MO | 4.17  | IIIA | 3 | 34 | 3  |
| 3 | 2 T3  | N3a | MO | 58.77 | IIIB | 3 | 58 | 7  |
| 5 | 3 T4a | N3b | MO | 21    | IIIC | 3 | 70 | 43 |
| 1 | 1 T3  | N3b | MO | 23.87 | IIIC | 3 | 34 | 26 |
| 3 | 2 T3  | N2  | MO | 15.57 | IIIA | 3 | 37 | 4  |
| 5 | 3 T4a | N2  | MO | 7.47  | IIIA | 3 | 25 | 6  |
| 2 | 1 T4a | N3a | MO | 22.5  | IIIB | 3 | 30 | 12 |
| 2 | 1 T4b | N2  | MO | 13.3  | IIIB | 3 | 26 | 5  |
| 5 | 3 T4a | N2  | MO | 11.9  | IIIA | 3 | 47 | 5  |
| 3 | 2 T4a | N3b | MO | 6.57  | IIIC | 3 | 53 | 44 |
| 4 | 3 T4b | N3b | MO | 6.3   | IIIC | 3 | 39 | 30 |
| 5 | 3 T4a | N2  | MO | 40.17 | IIIA | 3 | 47 | 4  |
| 3 | 2 T4b | N3b | MO | 20.47 | IIIC | 3 | 28 | 16 |
| 2 | 1 T4b | N0  | MO | 54.03 | IIIA | 3 | 31 | 0  |
| 3 | 2 T4a | N1  | MO | 54.07 | IIIA | 3 | 36 | 2  |
| 5 | 3 T4a | N3a | MO | 18.73 | IIIB | 3 | 63 | 13 |
| 5 | 3 T3  | N2  | MO | 3.87  | IIIA | 3 | 21 | 5  |
| 5 | 3 T4a | N2  | MO | 50.27 | IIIA | 3 | 32 | 3  |
| 1 | 1 T4a | N1  | MO | 50    | IIIA | 3 | 28 | 1  |
| 3 | 2 T3  | N2  | MO | 49.83 | IIIA | 3 | 49 | 4  |
| 5 | 3 T4a | N3a | MO | 50.6  | IIIB | 3 | 19 | 15 |
| 3 | 2 T4a | N3a | MO | 49.43 | IIIB | 3 | 45 | 9  |
| 5 | 3 T4a | N1  | MO | 25.17 | IIIA | 3 | 24 | 2  |
| 2 | 1 T4a | N1  | MO | 38.63 | IIIA | 3 | 25 | 2  |
| 3 | 2 T4b | N2  | MO | 32.2  | IIIB | 3 | 39 | 4  |
| 5 | 3 T3  | N3b | MO | 24.7  | IIIC | 3 | 35 | 19 |

|   |       |     |    |       |      |   |    |    |
|---|-------|-----|----|-------|------|---|----|----|
| 5 | 3 T4a | N3a | MO | 7.47  | IIIB | 3 | 38 | 8  |
| 3 | 2 T2  | N3a | MO | 48.3  | IIIA | 3 | 28 | 11 |
| 3 | 2 T3  | N3a | MO | 48.5  | IIIB | 3 | 17 | 10 |
| 5 | 3 T3  | N3b | MO | 17.93 | IIIC | 3 | 34 | 29 |
| 5 | 3 T4a | N3a | MO | 47.57 | IIIB | 3 | 24 | 8  |
| 5 | 3 T4b | N2  | MO | 11.9  | IIIB | 3 | 40 | 6  |
| 5 | 3 T3  | N3a | MO | 37.8  | IIIB | 3 | 74 | 13 |
| 3 | 2 T4a | N1  | MO | 22.97 | IIIA | 3 | 44 | 1  |
| 3 | 2 T4a | N3b | MO | 11.53 | IIIC | 3 | 31 | 16 |
| 5 | 3 T4a | N3a | MO | 8.37  | IIIB | 3 | 33 | 13 |
| 5 | 3 T4a | N3a | MO | 46.1  | IIIB | 3 | 65 | 10 |
| 5 | 3 T3  | N3a | MO | 20.17 | IIIB | 3 | 20 | 11 |
| 5 | 3 T4a | N1  | MO | 45.5  | IIIA | 3 | 31 | 2  |
| 4 | 3 T3  | N3a | MO | 15.5  | IIIB | 3 | 38 | 8  |
| 4 | 3 T4a | N3a | MO | 27.17 | IIIB | 3 | 28 | 7  |
| 5 | 3 T4a | N1  | MO | 45.37 | IIIA | 3 | 28 | 1  |
| 3 | 2 T4a | N3b | M1 | 10.57 | IV   | 4 | 35 | 17 |
| 3 | 2 T4a | N3b | MO | 49.5  | IIIC | 3 | 50 | 21 |
| 2 | 1 T4a | N2  | MO | 20.13 | IIIA | 3 | 32 | 5  |
| 2 | 1 T3  | N2  | MO | 40.5  | IIIA | 3 | 26 | 5  |
| 3 | 2 T3  | N3a | MO | 36.17 | IIIB | 3 | 21 | 10 |
| 3 | 2 T3  | N3b | MO | 13.83 | IIIC | 3 | 43 | 28 |
| 3 | 2 T3  | N3a | MO | 10.53 | IIIB | 3 | 16 | 13 |
| 2 | 1 T4a | N3a | MO | 8.83  | IIIB | 3 | 33 | 11 |
| 3 | 2 T4b | N0  | MO | 27.67 | IIIA | 3 | 16 | 0  |
| 3 | 2 T4a | N3a | MO | 30.3  | IIIB | 3 | 14 | 12 |
| 3 | 2 T4a | N3a | MO | 20.4  | IIIB | 3 | 44 | 7  |
| 1 | 1 T3  | N2  | MO | 40.37 | IIIA | 3 | 22 | 3  |
| 3 | 2 T3  | N2  | MO | 40.23 | IIIA | 3 | 22 | 3  |
| 5 | 3 T4a | N3b | MO | 15.4  | IIIC | 3 | 67 | 37 |
| 5 | 3 T4a | N1  | MO | 2.8   | IIIA | 3 | 72 | 2  |
| 5 | 3 T4a | N3a | M1 | 6.43  | IV   | 4 | 21 | 8  |
| 2 | 1 T4a | N2  | MO | 39.07 | IIIA | 3 | 27 | 5  |
| 1 | 1 T4a | N3a | MO | 30.1  | IIIB | 3 | 59 | 15 |
| 3 | 2 T3  | N2  | MO | 37.87 | IIIA | 3 | 36 | 6  |
| 5 | 3 T3  | N3a | MO | 22.53 | IIIB | 3 | 15 | 13 |
| 3 | 2 T4a | N3a | M1 | 33.13 | IV   | 4 | 54 | 13 |
| 3 | 2 T4a | N2  | MO | 37.5  | IIIA | 3 | 43 | 3  |
| 4 | 3 T4a | N3b | MO | 27.83 | IIIC | 3 | 33 | 28 |
| 3 | 2 T4a | N2  | MO | 37.2  | IIIA | 3 | 41 | 3  |
| 5 | 3 T4a | N1  | MO | 34.9  | IIIA | 3 | 40 | 1  |
| 5 | 3 T4a | N1  | MO | 34.7  | IIIA | 3 | 26 | 1  |
| 2 | 1 T4a | N1  | MO | 15.9  | IIIA | 3 | 32 | 2  |
| 3 | 2 T4a | N2  | MO | 34.87 | IIIA | 3 | 13 | 5  |
| 5 | 3 T4a | N3b | MO | 33.77 | IIIC | 3 | 37 | 21 |
| 1 | 1 T4b | N0  | MO | 33.37 | IIIA | 3 | 26 | 0  |
| 5 | 3 T4a | N3b | MO | 8.5   | IIIC | 3 | 49 | 26 |
| 4 | 3 T4a | N3b | M1 | 3.17  | IV   | 4 | 47 | 29 |
| 3 | 2 T3  | N3a | MO | 13.33 | IIIB | 3 | 68 | 11 |
| 5 | 3 T3  | N2  | MO | 10.3  | IIIA | 3 | 18 | 5  |
| 1 | 1 T4b | N0  | MO | 30.5  | IIIA | 3 | 44 | 0  |
| 5 | 3 T4a | N3b | MO | 7.1   | IIIC | 3 | 39 | 20 |
| 1 | 1 T4b | N2  | MO | 30    | IIIB | 3 | 45 | 4  |
| 5 | 3 T4b | N2  | M1 | 30.3  | IV   | 4 | 32 | 6  |

|   |       |     |    |            |   |    |    |
|---|-------|-----|----|------------|---|----|----|
| 5 | 3 T3  | N2  | MO | 29.9 IIIA  | 3 | 21 | 3  |
| 5 | 3 T4a | N2  | MO | 29.4 IIIA  | 3 | 49 | 6  |
| 5 | 3 T4a | N3b | MO | 20.2 IIIC  | 3 | 36 | 24 |
| 5 | 3 T4a | N3a | MO | 5.23 IIIB  | 3 | 11 | 9  |
| 5 | 3 T3  | N3a | MO | 24.47 IIIB | 3 | 27 | 7  |
| 3 | 2 T3  | N2  | MO | 23.8 IIIA  | 3 | 34 | 3  |
| 3 | 2 T4a | N3b | MO | 23.57 IIIC | 3 | 21 | 20 |
| 5 | 3 T3  | N3a | MO | 23.3 IIIB  | 3 | 46 | 9  |
| 5 | 3 T3  | N1  | MO | 102.5 IIB  | 2 | 23 | 2  |
| 3 | 2 T4a | N0  | MO | 23.5 IIB   | 2 | 21 | 0  |
| 5 | 3 T2  | N1  | MO | 98.1 IIA   | 2 | 21 | 1  |
| 5 | 3 T3  | N1  | MO | 11.6 IIB   | 2 | 32 | 1  |
| 4 | 3 T3  | N1  | MO | 94.4 IIB   | 2 | 12 | 1  |
| 2 | 1 T3  | N0  | MO | 91.1 IIA   | 2 | 28 | 0  |
| 3 | 2 T2  | N2  | MO | 16.4 IIB   | 2 | 15 | 5  |
| 3 | 2 T3  | N1  | MO | 67.33 IIB  | 2 | 12 | 2  |
| 5 | 3 T3  | N1  | MO | 87.9 IIB   | 2 | 10 | 1  |
| 3 | 2 T3  | N1  | MO | 87.93 IIB  | 2 | 32 | 2  |
| 5 | 3 T3  | N1  | MO | 13.8 IIB   | 2 | 26 | 2  |
| 3 | 2 T2  | N1  | MO | 83.13 IIA  | 2 | 21 | 1  |
| 3 | 2 T3  | N1  | MO | 80.63 IIB  | 2 | 13 | 1  |
| 3 | 2 T1a | N2  | MO | 66.8 IIA   | 2 | 38 | 3  |
| 3 | 2 T4a | N0  | MO | 1.43 IIB   | 2 | 58 | 0  |
| 5 | 3 T4a | N0  | MO | 76.67 IIB  | 2 | 12 | 0  |
| 3 | 2 T3  | N0  | MO | 76.6 IIA   | 2 | 20 | 0  |
| 2 | 1 T3  | N1  | MO | 75.53 IIB  | 2 | 19 | 1  |
| 5 | 3 T3  | N0  | MO | 75.4 IIA   | 2 | 24 | 0  |
| 3 | 2 T4a | N0  | MO | 42.27 IIB  | 2 | 36 | 0  |
| 5 | 3 T3  | N1  | MO | 12.5 IIB   | 2 | 17 | 1  |
| 5 | 3 T3  | N1  | MO | 4.4 IIB    | 2 | 60 | 1  |
| 3 | 2 T2  | N1  | MO | 23.8 IIA   | 2 | 28 | 1  |
| 5 | 3 T3  | N0  | MO | 72.3 IIA   | 2 | 41 | 0  |
| 5 | 3 T3  | N1  | MO | 61.63 IIB  | 2 | 13 | 1  |
| 5 | 3 T3  | N0  | MO | 71.33 IIA  | 2 | 25 | 0  |
| 3 | 2 T4a | N0  | MO | 29.4 IIB   | 2 | 37 | 0  |
| 3 | 2 T3  | N0  | MO | 25.2 IIA   | 2 | 27 | 0  |
| 3 | 2 T3  | N0  | MO | 69.2 IIA   | 2 | 40 | 0  |
| 3 | 2 T1b | N2  | MO | 69.17 IIA  | 2 | 19 | 3  |
| 4 | 3 T3  | N1  | MO | 38.93 IIB  | 2 | 20 | 1  |
| 5 | 3 T4a | N0  | MO | 68.97 IIB  | 2 | 50 | 0  |
| 3 | 2 T4a | N0  | MO | 32.63 IIB  | 2 | 32 | 0  |
| 5 | 3 T1b | N2  | MO | 13.37 IIA  | 2 | 39 | 6  |
| 3 | 2 T3  | N0  | MO | 19.13 IIA  | 2 | 16 | 0  |
| 3 | 2 T2  | N2  | MO | 24.2 IIB   | 2 | 40 | 6  |
| 1 | 1 T3  | N1  | MO | 61.27 IIB  | 2 | 37 | 1  |
| 3 | 2 T4a | N0  | MO | 60.77 IIB  | 2 | 47 | 0  |
| 5 | 3 T2  | N1  | MO | 60.3 IIA   | 2 | 10 | 1  |
| 2 | 1 T4a | N0  | MO | 18.03 IIB  | 2 | 20 | 0  |
| 3 | 2 T4a | N0  | MO | 59.7 IIB   | 2 | 33 | 0  |
| 1 | 1 T3  | N0  | MO | 59.67 IIA  | 2 | 39 | 0  |
| 5 | 3 T3  | N1  | MO | 63.47 IIB  | 2 | 33 | 2  |
| 3 | 2 T3  | N0  | MO | 58.23 IIA  | 2 | 28 | 0  |
| 3 | 2 T4a | N0  | MO | 57.4 IIB   | 2 | 31 | 0  |
| 3 | 2 T4a | N0  | MO | 57.4 IIB   | 2 | 45 | 0  |

|   |       |    |    |           |   |    |   |
|---|-------|----|----|-----------|---|----|---|
| 3 | 2 T3  | NO | MO | 57.97 IIA | 2 | 41 | 0 |
| 3 | 2 T4a | NO | MO | 24.27 IIB | 2 | 17 | 0 |
| 3 | 2 T2  | N1 | MO | 54.2 IIA  | 2 | 27 | 1 |
| 5 | 3 T3  | N1 | MO | 13.93 IIB | 2 | 45 | 2 |
| 3 | 2 T2  | N1 | MO | 53.83 IIA | 2 | 26 | 1 |
| 3 | 2 T4a | NO | MO | 54.6 IIB  | 2 | 24 | 0 |
| 5 | 3 T3  | NO | MO | 53.03 IIA | 2 | 11 | 0 |
| 3 | 2 T1b | N2 | MO | 54 IIA    | 2 | 29 | 5 |
| 3 | 2 T4a | NO | MO | 15.93 IIB | 2 | 53 | 0 |
| 3 | 2 T4a | NO | MO | 51.07 IIB | 2 | 61 | 0 |
| 4 | 3 T3  | N1 | MO | 51.1 IIB  | 2 | 46 | 2 |
| 1 | 1 T3  | NO | MO | 50 IIA    | 2 | 20 | 0 |
| 3 | 2 T3  | N1 | MO | 35.67 IIB | 2 | 57 | 2 |
| 3 | 2 T2  | N1 | MO | 49.1 IIA  | 2 | 23 | 2 |
| 1 | 1 T2  | N1 | MO | 49 IIA    | 2 | 45 | 2 |
| 2 | 1 T2  | N2 | MO | 48.77 IIB | 2 | 30 | 3 |
| 5 | 3 T2  | N2 | MO | 6.1 IIB   | 2 | 36 | 5 |
| 3 | 2 T3  | NO | MO | 31.6 IIA  | 2 | 17 | 0 |
| 1 | 1 T3  | NO | MO | 49.6 IIA  | 2 | 15 | 0 |
| 4 | 3 T4a | NO | MO | 47.77 IIB | 2 | 29 | 0 |
| 3 | 2 T3  | NO | MO | 7.03 IIA  | 2 | 16 | 0 |
| 3 | 2 T3  | N1 | MO | 47.37 IIB | 2 | 25 | 1 |
| 2 | 1 T3  | N1 | MO | 47.03 IIB | 2 | 42 | 2 |
| 5 | 3 T2  | N1 | MO | 46.9 IIA  | 2 | 33 | 2 |
| 3 | 2 T2  | N1 | MO | 46.23 IIA | 2 | 24 | 1 |
| 3 | 2 T3  | N1 | MO | 45.87 IIB | 2 | 33 | 1 |
| 3 | 2 T3  | NO | MO | 45.9 IIA  | 2 | 36 | 0 |
| 3 | 2 T3  | NO | MO | 44.7 IIA  | 2 | 24 | 0 |
| 2 | 1 T3  | NO | MO | 20.33 IIA | 2 | 23 | 0 |
| 3 | 2 T3  | NO | MO | 44.73 IIA | 2 | 37 | 0 |
| 2 | 1 T4a | NO | MO | 44.3 IIB  | 2 | 36 | 0 |
| 3 | 2 T3  | NO | MO | 27 IIA    | 2 | 17 | 0 |
| 4 | 3 T4a | NO | MO | 43.83 IIB | 2 | 39 | 0 |
| 3 | 2 T2  | N1 | MO | 41.13 IIA | 2 | 56 | 1 |
| 3 | 2 T3  | NO | MO | 41.03 IIA | 2 | 32 | 0 |
| 3 | 2 T2  | N1 | MO | 12.97 IIA | 2 | 28 | 2 |
| 5 | 3 T2  | N1 | MO | 22.17 IIA | 2 | 33 | 1 |
| 5 | 3 T4a | NO | MO | 39.37 IIB | 2 | 25 | 0 |
| 2 | 1 T4a | NO | MO | 20 IIB    | 2 | 44 | 0 |
| 3 | 2 T1b | N2 | MO | 31.37 IIA | 2 | 35 | 5 |
| 3 | 2 T2  | N1 | MO | 5.57 IIA  | 2 | 14 | 1 |
| 5 | 3 T3  | NO | MO | 38.27 IIA | 2 | 31 | 0 |
| 3 | 2 T3  | NO | MO | 37.73 IIA | 2 | 29 | 0 |
| 2 | 1 T3  | NO | MO | 34.57 IIA | 2 | 22 | 0 |
| 3 | 2 T3  | NO | MO | 34.33 IIA | 2 | 39 | 0 |
| 2 | 1 T2  | N2 | MO | 33.13 IIB | 2 | 32 | 3 |
| 3 | 2 T2  | N2 | MO | 30.8 IIB  | 2 | 33 | 3 |
| 3 | 2 T3  | N1 | MO | 30.8 IIB  | 2 | 19 | 1 |
| 3 | 2 T3  | NO | MO | 30.6 IIA  | 2 | 18 | 0 |
| 1 | 1 T3  | N1 | MO | 29.8 IIB  | 2 | 27 | 1 |
| 3 | 2 T4a | NO | MO | 26.03 IIB | 2 | 53 | 0 |
| 5 | 3 T4a | NO | MO | 25.9 IIB  | 2 | 38 | 0 |
| 3 | 2 T3  | NO | MO | 22.23 IIA | 2 | 51 | 0 |
| 3 | 2 T2  | N1 | MO | 25.37 IIA | 2 | 51 | 2 |

|   |       |    |    |          |   |     |   |
|---|-------|----|----|----------|---|-----|---|
| 5 | 3 T2  | NO | MO | 14.67 IB | 1 | 19  | 0 |
| 4 | 3 T1b | N1 | MO | 13.3 IB  | 1 | 25  | 2 |
| 1 | 1 T2  | NO | MO | 98.13 IB | 1 | 19  | 0 |
| 5 | 3 T2  | NO | MO | 95.43 IB | 1 | 43  | 0 |
| 5 | 3 T1b | N1 | MO | 94.17 IB | 1 | 31  | 1 |
| 1 | 1 T2  | NO | MO | 50.9 IB  | 1 | 28  | 0 |
| 1 | 1 T1a | N1 | MO | 88.57 IB | 1 | 21  | 1 |
| 2 | 1 T1a | NO | MO | 87.33 IA | 1 | 30  | 0 |
| 2 | 1 T1b | NO | MO | 85.83 IA | 1 | 32  | 0 |
| 1 | 1 T1b | NO | MO | 85.5 IA  | 1 | 26  | 0 |
| 3 | 2 T1b | N1 | MO | 85.17 IB | 1 | 22  | 1 |
| 1 | 1 T1a | NO | MO | 79.93 IA | 1 | 26  | 0 |
| 5 | 3 T1a | NO | MO | 79.87 IA | 1 | 35  | 0 |
| 5 | 3 T2  | NO | MO | 72.4 IB  | 1 | 47  | 0 |
| 3 | 2 T1b | NO | MO | 72.73 IA | 1 | 39  | 0 |
| 3 | 2 T2  | NO | MO | 71.87 IB | 1 | 24  | 0 |
| 1 | 1 T1b | NO | MO | 34.5 IA  | 1 | 26  | 0 |
| 5 | 3 T1b | NO | MO | 67.83 IA | 1 | 17  | 0 |
| 1 | 1 T1a | NO | MO | 60.3 IA  | 1 | 20  | 0 |
| 3 | 2 T1b | N1 | MO | 59.5 IB  | 1 | 28  | 1 |
| 2 | 1 T2  | NO | MO | 59.03 IB | 1 | 58  | 0 |
| 5 | 3 T1b | NO | MO | 58.5 IA  | 1 | 16  | 0 |
| 3 | 2 T2  | NO | MO | 59.03 IB | 1 | 16  | 0 |
| 3 | 2 T2  | NO | MO | 57.53 IB | 1 | 43  | 0 |
| 5 | 3 T2  | NO | MO | 56.7 IB  | 1 | 16  | 0 |
| 3 | 2 T1b | N1 | MO | 56.47 IB | 1 | 42  | 1 |
| 4 | 3 T2  | NO | MO | 56.2 IB  | 1 | 16  | 0 |
| 1 | 1 T1a | NO | MO | 53.07 IA | 1 | 39  | 0 |
| 3 | 2 T2  | NO | MO | 52.53 IB | 1 | 20  | 0 |
| 1 | 1 T1b | NO | MO | 50.53 IA | 1 | 35  | 0 |
| 2 | 1 T2  | NO | MO | 50.53 IB | 1 | 64  | 0 |
| 2 | 1 T1b | NO | MO | 50.27 IA | 1 | 21  | 0 |
| 3 | 2 T2  | NO | MO | 49.63 IB | 1 | 18  | 0 |
| 5 | 3 T1a | NO | MO | 49.17 IA | 1 | 27  | 0 |
| 1 | 1 T1a | NO | MO | 49.67 IA | 1 | 16  | 0 |
| 5 | 3 T2  | NO | MO | 48.23 IB | 1 | 18  | 0 |
| 1 | 1 T2  | NO | MO | 47.8 IB  | 1 | 37  | 0 |
| 2 | 1 T1a | NO | MO | 47.13 IA | 1 | 18  | 0 |
| 3 | 2 T1a | N1 | MO | 47.07 IB | 1 | 76  | 2 |
| 5 | 3 T2  | NO | MO | 45.73 IB | 1 | 101 | 0 |
| 3 | 2 T2  | NO | MO | 44.8 IB  | 1 | 28  | 0 |
| 3 | 2 T2  | NO | MO | 43.57 IB | 1 | 46  | 0 |
| 4 | 3 T2  | NO | MO | 42.87 IB | 1 | 24  | 0 |
| 1 | 1 T2  | NO | MO | 39.97 IB | 1 | 37  | 0 |
| 1 | 1 T1b | NO | MO | 39.8 IA  | 1 | 16  | 0 |
| 3 | 2 T1b | NO | MO | 39.47 IA | 1 | 38  | 0 |
| 5 | 3 T1b | NO | MO | 0.5 IA   | 1 | 34  | 0 |
| 3 | 2 T2  | NO | MO | 12 IB    | 1 | 25  | 0 |
| 3 | 2 T1b | NO | MO | 33.9 IA  | 1 | 26  | 0 |
| 3 | 2 T2  | NO | MO | 10.73 IB | 1 | 28  | 0 |
| 2 | 1 T1b | NO | MO | 29.93 IA | 1 | 46  | 0 |
| 1 | 1 T1b | NO | MO | 29.7 IA  | 1 | 20  | 0 |
| 3 | 2 T2  | NO | MO | 29.43 IB | 1 | 12  | 0 |
| 5 | 3 T1b | N1 | MO | 25.67 IB | 1 | 14  | 2 |

|   |       |    |    |               |   |    |   |
|---|-------|----|----|---------------|---|----|---|
| 1 | 1 T2  | NO | MO | 25.1 IB       | 1 | 36 | 0 |
| 1 | 1 T1b | NO | MO | 25.13 IA      | 1 | 34 | 0 |
| 5 | 3 T2  | NO | MO | 24.77 IB      | 1 | 10 | 0 |
| 1 | 1 T1a | N1 | MO | 24.47 IB      | 1 | 39 | 1 |
| 1 | 1 T2  | NO | MO | 22.33 IB      | 1 | 23 | 0 |
| 3 | 2 T2  | NO | MO | 23.43 IB      | 1 | 21 | 0 |
| 1 | 1 T1a | NO | MO | 23.33 IA      | 1 | 24 | 0 |
| 3 | 2 T1b | NO | MO | 23.3 IA       | 1 | 18 | 0 |
| 3 | 2 T1b | N1 | MO | 22.9 IB       | 1 | 36 | 1 |
| 1 | 1 Tis | NO | MO | 37.9 0 stage  | 1 | 12 | 0 |
| 1 | 1 Tis | NO | MO | 7.5 0 stage   | 1 | 27 | 0 |
| 1 | 1 Tis | NO | MO | 75.1 0 stage  | 1 | 25 | 0 |
| 1 | 1 Tis | NO | MO | 64.07 0 stage | 1 | 18 | 0 |
| 1 | 1 Tis | NO | MO | 54.37 0 stage | 1 | 38 | 0 |
| 1 | 1 Tis | NO | MO | 47.5 0 stage  | 1 | 47 | 0 |
| 1 | 1 Tis | NO | MO | 45.5 0 stage  | 1 | 43 | 0 |
| 5 | 3 Tis | NO | MO | 44.23 0 stage | 1 | 38 | 0 |
| 1 | 1 Tis | NO | MO | 37.33 0 stage | 1 | 23 | 0 |
| 1 | 1 Tis | NO | MO | 32 0 stage    | 1 | 11 | 0 |
| 2 | 1 Tis | NO | MO | 26.93 0 stage | 1 | 33 | 0 |



| 生存状态<br>2死亡 | 阳性淋巴<br>结分组 | 清扫个数<br>分级≤<br>15=1, ≤<br>30=2, ><br>30=3 | 无反应组生存<br>状态2死亡 | 无反应组<br>时间 | 无反应组<br>清扫淋巴<br>结分组 | 无反应组<br>阳性淋巴<br>结分组 | 无反应组<br>影像学评<br>分 |
|-------------|-------------|-------------------------------------------|-----------------|------------|---------------------|---------------------|-------------------|
| 1           | 1           | 3                                         | 1               | 106.5      | 2                   | 0                   | 1                 |
| 1           | 0           | 2                                         | 1               | 88.73      | 2                   | 4                   | 1                 |
| 2           | 1           | 1                                         | 1               | 84.8       | 3                   | 2                   | 1                 |
| 1           | 4           | 2                                         | 1               | 65.6       | 3                   | 0                   | 1                 |
| 1           | 2           | 3                                         | 1               | 51.9       | 3                   | 3                   | 2                 |
| 1           | 0           | 3                                         | 2               | 42.53      | 3                   | 2                   | 2                 |
| 1           | 0           | 2                                         | 1               | 51.47      | 3                   | 1                   | 2                 |
| 2           | 2           | 2                                         | 2               | 37.57      | 3                   | 4                   | 1                 |
| 1           | 0           | 3                                         | 1               | 74         | 2                   | 2                   | 1                 |
| 1           | 0           | 3                                         | 1               | 81.33      | 3                   | 1                   | 2                 |
| 1           | 3           | 3                                         | 2               | 13.77      | 3                   | 2                   | 2                 |
| 1           | 1           | 2                                         | 1               | 68.1       | 3                   | 0                   | 1                 |
| 2           | 2           | 3                                         | 2               | 4.17       | 3                   | 3                   | 1                 |
| 1           | 1           | 3                                         | 2               | 24.1       | 2                   | 1                   | 1                 |
| 1           | 2           | 2                                         | 2               | 27.57      | 3                   | 4                   | 2                 |
| 2           | 1           | 3                                         | 2               | 6.47       | 2                   | 2                   | 3                 |
| 2           | 4           | 3                                         | 2               | 7.8        | 3                   | 4                   | 1                 |
| 1           | 1           | 2                                         | 2               | 18.33      | 3                   | 4                   | 2                 |
| 1           | 0           | 2                                         | 2               | 17.7       | 2                   | 1                   | 2                 |
| 1           | 4           | 3                                         | 2               | 13.5       | 2                   | 4                   | 3                 |
| 1           | 2           | 3                                         | 2               | 46         | 3                   | 4                   | 2                 |
| 1           | 2           | 2                                         | 2               | 68.5       | 2                   | 0                   | 1                 |
| 2           | 0           | 2                                         | 2               | 24         | 1                   | 1                   | 1                 |
| 1           | 1           | 3                                         | 2               | 18         | 2                   | 2                   | 1                 |
| 2           | 2           | 3                                         | 2               | 8.6        | 2                   | 4                   | 1                 |
| 2           | 1           | 2                                         | 2               | 10.17      | 2                   | 3                   | 3                 |
| 1           | 1           | 2                                         | 2               | 21.8       | 3                   | 4                   | 2                 |
| 2           | 0           | 2                                         | 2               | 16.27      | 2                   | 0                   | 1                 |
| 2           | 1           | 3                                         | 2               | 74.87      | 3                   | 2                   | 1                 |
| 1           | 0           | 3                                         | 2               | 54.67      | 2                   | 4                   | 1                 |
| 2           | 3           | 3                                         | 2               | 21.5       | 2                   | 3                   | 1                 |
| 2           | 0           | 2                                         | 2               | 12         | 2                   | 1                   | 1                 |
| 1           | 0           | 3                                         | 2               | 7.97       | 2                   | 2                   | 2                 |
| 2           | 1           | 2                                         | 2               | 6.97       | 2                   | 3                   | 3                 |
| 2           | 4           | 3                                         | 2               | 8.8        | 2                   | 3                   | 2                 |
| 2           | 4           | 3                                         | 1               | 90.53      | 3                   | 3                   | 1                 |
| 2           | 4           | 3                                         | 2               | 6          | 1                   | 3                   | 1                 |
| 2           | 4           | 3                                         | 1               | 86.5       | 2                   | 2                   | 2                 |
| 2           | 2           | 2                                         | 2               | 52         | 3                   | 2                   | 2                 |
| 2           | 4           | 3                                         | 1               | 84.8       | 3                   | 3                   | 1                 |
| 2           | 1           | 3                                         | 2               | 1.47       | 2                   | 3                   | 1                 |
| 2           | 3           | 3                                         | 2               | 5.37       | 2                   | 1                   | 2                 |
| 2           | 4           | 3                                         | 2               | 4.2        | 2                   | 4                   | 1                 |
| 2           | 1           | 2                                         | 2               | 7.5        | 2                   | 4                   | 2                 |
| 2           | 3           | 3                                         | 2               | 49.43      | 3                   | 4                   | 2                 |
| 2           | 4           | 2                                         | 1               | 25.63      | 3                   | 0                   | 1                 |
| 2           | 4           | 3                                         | 1               | 77.13      | 2                   | 2                   | 2                 |
| 2           | 3           | 2                                         | 2               | 18.5       | 3                   | 4                   | 2                 |
| 2           | 0           | 2                                         | 2               | 38.1       | 3                   | 3                   | 2                 |

|   |   |   |   |       |   |   |   |
|---|---|---|---|-------|---|---|---|
| 2 | 1 | 1 | 2 | 43.33 | 3 | 4 | 2 |
| 2 | 2 | 2 | 2 | 2.63  | 1 | 3 | 3 |
| 2 | 4 | 2 | 1 | 50.97 | 1 | 1 | 2 |
| 1 | 2 | 3 | 2 | 41.93 | 2 | 3 | 2 |
| 2 | 3 | 2 | 1 | 48    | 1 | 1 | 2 |
| 2 | 4 | 3 | 2 | 18.37 | 2 | 1 | 1 |
| 2 | 0 | 3 | 2 | 16    | 2 | 4 | 3 |
| 2 | 0 | 2 | 2 | 16.57 | 2 | 2 | 3 |
| 2 | 2 | 3 | 2 | 10.6  | 2 | 3 | 2 |
| 2 | 4 | 2 | 1 | 72.3  | 3 | 2 | 2 |
| 2 | 3 | 2 | 1 | 71.33 | 2 | 3 | 2 |
| 2 | 1 | 2 | 2 | 1.33  | 3 | 4 | 2 |
| 2 | 2 | 3 | 1 | 70.57 | 3 | 4 | 1 |
| 2 | 2 | 2 | 1 | 4     | 3 | 4 | 1 |
| 2 | 3 | 2 | 2 | 6     | 2 | 3 | 1 |
| 2 | 3 | 2 | 2 | 12.3  | 3 | 2 | 1 |
| 1 | 3 | 3 | 2 | 17.3  | 2 | 1 | 2 |
| 2 | 3 | 1 | 2 | 11.43 | 3 | 4 | 1 |
| 2 | 1 | 3 | 2 | 3.3   | 2 | 2 | 3 |
| 2 | 3 | 1 | 2 | 10.6  | 3 | 3 | 2 |
| 2 | 2 | 2 | 2 | 15.77 | 2 | 2 | 1 |
| 2 | 3 | 2 | 1 | 2.5   | 3 | 4 | 3 |
| 1 | 2 | 2 | 2 | 11.83 | 2 | 3 | 1 |
| 2 | 1 | 3 | 1 | 35.5  | 3 | 2 | 2 |
| 1 | 0 | 2 | 2 | 3.33  | 3 | 4 | 3 |
| 2 | 3 | 3 | 2 | 1.6   | 2 | 4 | 3 |
| 1 | 2 | 2 | 2 | 19    | 2 | 4 | 2 |
| 2 | 2 | 3 | 2 | 7.87  | 3 | 4 | 1 |
| 1 | 3 | 3 | 2 | 19.2  | 1 | 3 | 2 |
| 2 | 2 | 2 | 2 | 4.17  | 3 | 2 | 2 |
| 1 | 1 | 1 | 2 | 21    | 3 | 4 | 1 |
| 2 | 2 | 1 | 2 | 7.47  | 2 | 2 | 1 |
| 2 | 3 | 2 | 2 | 11.9  | 2 | 2 | 1 |
| 1 | 3 | 2 | 2 | 6.3   | 3 | 4 | 1 |
| 2 | 1 | 2 | 2 | 40.17 | 3 | 2 | 1 |
| 2 | 4 | 2 | 2 | 18.73 | 3 | 3 | 2 |
| 2 | 4 | 2 | 2 | 3.87  | 2 | 2 | 1 |
| 2 | 4 | 3 | 1 | 50.27 | 3 | 2 | 1 |
| 2 | 0 | 2 | 2 | 50.6  | 2 | 3 | 1 |
| 1 | 0 | 3 | 2 | 25.17 | 2 | 1 | 1 |
| 1 | 2 | 2 | 2 | 24.7  | 3 | 4 | 2 |
| 2 | 4 | 3 | 2 | 7.47  | 3 | 3 | 1 |
| 2 | 3 | 3 | 2 | 17.93 | 3 | 4 | 2 |
| 2 | 4 | 3 | 1 | 47.57 | 2 | 3 | 2 |
| 2 | 3 | 1 | 2 | 11.9  | 3 | 2 | 2 |
| 1 | 1 | 1 | 2 | 37.8  | 3 | 3 | 2 |
| 2 | 3 | 2 | 2 | 8.37  | 3 | 3 | 2 |
| 1 | 1 | 1 | 1 | 46.1  | 3 | 3 | 2 |
| 2 | 3 | 3 | 2 | 20.17 | 2 | 3 | 1 |
| 2 | 1 | 2 | 1 | 45.5  | 3 | 1 | 1 |
| 2 | 4 | 2 | 2 | 15.5  | 3 | 3 | 2 |
| 2 | 2 | 2 | 2 | 27.17 | 2 | 3 | 2 |
| 2 | 3 | 2 | 1 | 45.37 | 2 | 1 | 1 |
| 1 | 2 | 3 | 2 | 15.4  | 3 | 4 | 2 |

|   |   |   |   |       |   |   |   |
|---|---|---|---|-------|---|---|---|
| 2 | 4 | 3 | 2 | 2.8   | 3 | 1 | 1 |
| 1 | 3 | 2 | 2 | 6.43  | 2 | 3 | 2 |
| 2 | 4 | 3 | 2 | 22.53 | 1 | 3 | 2 |
| 1 | 4 | 3 | 2 | 27.83 | 3 | 4 | 2 |
| 1 | 4 | 3 | 1 | 34.9  | 3 | 1 | 1 |
| 1 | 2 | 3 | 1 | 34.7  | 2 | 1 | 1 |
| 2 | 3 | 2 | 1 | 33.77 | 3 | 4 | 2 |
| 2 | 2 | 3 | 2 | 8.5   | 3 | 4 | 3 |
| 2 | 1 | 2 | 2 | 3.17  | 3 | 4 | 2 |
| 2 | 4 | 3 | 1 | 10.3  | 2 | 2 | 2 |
| 2 | 2 | 2 | 2 | 7.1   | 3 | 4 | 2 |
| 2 | 2 | 2 | 1 | 30.3  | 3 | 2 | 2 |
| 1 | 1 | 3 | 1 | 29.9  | 2 | 2 | 2 |
| 2 | 2 | 3 | 1 | 29.4  | 3 | 2 | 2 |
| 2 | 3 | 3 | 2 | 20.2  | 3 | 4 | 2 |
| 2 | 2 | 2 | 2 | 5.23  | 1 | 3 | 2 |
| 1 | 4 | 3 | 1 | 24.47 | 2 | 3 | 1 |
| 2 | 3 | 2 | 1 | 23.3  | 3 | 3 | 2 |
| 1 | 2 | 3 | 1 | 102.5 | 2 | 1 | 2 |
| 2 | 4 | 3 | 1 | 98.1  | 2 | 1 | 2 |
| 2 | 2 | 3 | 2 | 11.6  | 3 | 1 | 1 |
| 2 | 4 | 3 | 1 | 94.4  | 1 | 1 | 1 |
| 2 | 4 | 2 | 1 | 87.9  | 1 | 1 | 1 |
| 2 | 4 | 2 | 2 | 13.8  | 2 | 1 | 1 |
| 1 | 2 | 3 | 2 | 76.67 | 1 | 0 | 1 |
| 2 | 4 | 3 | 1 | 75.4  | 2 | 0 | 1 |
| 2 | 4 | 3 | 2 | 12.5  | 2 | 1 | 3 |
| 2 | 3 | 1 | 2 | 4.4   | 3 | 1 | 2 |
| 2 | 2 | 3 | 2 | 72.3  | 3 | 0 | 2 |
| 1 | 3 | 3 | 2 | 61.63 | 1 | 1 | 2 |
| 2 | 4 | 3 | 2 | 71.33 | 2 | 0 | 2 |
| 2 | 4 | 3 | 2 | 38.93 | 2 | 1 | 1 |
| 2 | 2 | 3 | 2 | 68.97 | 2 | 0 | 2 |
| 2 | 2 | 2 | 2 | 13.37 | 3 | 2 | 3 |
| 2 | 3 | 2 | 1 | 60.3  | 1 | 1 | 1 |
| 1 | 2 | 2 | 1 | 63.47 | 3 | 1 | 1 |
| 2 | 2 | 2 | 2 | 13.93 | 3 | 1 | 1 |
| 2 | 4 | 3 | 1 | 53.03 | 1 | 0 | 1 |
| 2 | 4 | 3 | 1 | 51.1  | 3 | 1 | 1 |
| 2 | 2 | 3 | 2 | 6.1   | 3 | 2 | 2 |
| 2 | 4 | 2 | 1 | 47.77 | 2 | 0 | 1 |
| 1 | 0 | 3 | 1 | 46.9  | 3 | 1 | 1 |
| 1 | 1 | 3 | 1 | 43.83 | 3 | 0 | 1 |
| 2 | 3 | 3 | 2 | 22.17 | 3 | 1 | 2 |
| 2 | 2 | 2 | 1 | 39.37 | 2 | 0 | 1 |
| 1 | 2 | 3 | 1 | 38.27 | 3 | 0 | 1 |
| 1 | 1 | 2 | 1 | 25.9  | 3 | 0 | 2 |
| 1 | 2 | 3 | 2 | 14.67 | 2 | 0 | 1 |
| 2 | 3 | 2 | 2 | 13.3  | 2 | 1 | 3 |
| 1 | 3 | 3 | 1 | 95.43 | 3 | 0 | 1 |
| 2 | 1 | 2 | 1 | 94.17 | 2 | 1 | 1 |
| 2 | 1 | 2 | 1 | 79.87 | 3 | 0 | 1 |
| 2 | 2 | 3 | 1 | 72.4  | 3 | 0 | 1 |
| 2 | 4 | 3 | 1 | 67.83 | 2 | 0 | 1 |

|   |   |   |   |       |   |   |   |
|---|---|---|---|-------|---|---|---|
| 2 | 3 | 3 | 1 | 58.5  | 2 | 0 | 1 |
| 1 | 3 | 2 | 1 | 56.7  | 2 | 0 | 1 |
| 1 | 3 | 2 | 1 | 56.2  | 2 | 0 | 1 |
| 2 | 4 | 3 | 1 | 49.17 | 2 | 0 | 1 |
| 1 | 3 | 2 | 1 | 48.23 | 2 | 0 | 1 |
| 2 | 2 | 3 | 1 | 45.73 | 3 | 0 | 1 |
| 2 | 3 | 3 | 1 | 42.87 | 2 | 0 | 1 |
| 2 | 1 | 3 | 1 | 0.5   | 3 | 0 | 1 |
| 2 | 4 | 3 | 1 | 25.67 | 1 | 1 | 2 |
| 2 | 3 | 3 | 1 | 24.77 | 1 | 0 | 2 |
| 1 | 3 | 3 | 1 | 44.23 | 3 | 0 | 1 |
| 2 | 3 | 2 |   |       |   |   |   |
| 1 | 1 | 3 |   |       |   |   |   |
| 2 | 3 | 3 |   |       |   |   |   |
| 2 | 3 | 2 |   |       |   |   |   |
| 1 | 1 | 2 |   |       |   |   |   |
| 2 | 4 | 3 |   |       |   |   |   |
| 1 | 4 | 3 |   |       |   |   |   |
| 2 | 2 | 3 |   |       |   |   |   |
| 2 | 2 | 2 |   |       |   |   |   |
| 2 | 3 | 2 |   |       |   |   |   |
| 2 | 4 | 3 |   |       |   |   |   |
| 2 | 3 | 2 |   |       |   |   |   |
| 2 | 3 | 3 |   |       |   |   |   |
| 2 | 0 | 2 |   |       |   |   |   |
| 2 | 3 | 1 |   |       |   |   |   |
| 2 | 3 | 3 |   |       |   |   |   |
| 2 | 2 | 2 |   |       |   |   |   |
| 1 | 2 | 2 |   |       |   |   |   |
| 2 | 4 | 3 |   |       |   |   |   |
| 2 | 1 | 3 |   |       |   |   |   |
| 2 | 3 | 2 |   |       |   |   |   |
| 1 | 2 | 2 |   |       |   |   |   |
| 2 | 3 | 3 |   |       |   |   |   |
| 1 | 2 | 3 |   |       |   |   |   |
| 2 | 3 | 1 |   |       |   |   |   |
| 2 | 3 | 3 |   |       |   |   |   |
| 1 | 2 | 3 |   |       |   |   |   |
| 2 | 4 | 3 |   |       |   |   |   |
| 1 | 2 | 3 |   |       |   |   |   |
| 1 | 1 | 3 |   |       |   |   |   |
| 1 | 1 | 2 |   |       |   |   |   |
| 2 | 1 | 3 |   |       |   |   |   |
| 1 | 2 | 1 |   |       |   |   |   |
| 1 | 4 | 3 |   |       |   |   |   |
| 1 | 0 | 2 |   |       |   |   |   |
| 2 | 4 | 3 |   |       |   |   |   |
| 2 | 4 | 3 |   |       |   |   |   |
| 2 | 4 | 3 |   |       |   |   |   |
| 2 | 3 | 3 |   |       |   |   |   |
| 1 | 2 | 2 |   |       |   |   |   |
| 1 | 0 | 3 |   |       |   |   |   |
| 2 | 4 | 3 |   |       |   |   |   |
| 2 | 2 | 3 |   |       |   |   |   |
| 1 | 2 | 3 |   |       |   |   |   |

|   |   |   |
|---|---|---|
| 1 | 2 | 2 |
| 1 | 2 | 3 |
| 2 | 4 | 3 |
| 2 | 3 | 1 |
| 1 | 3 | 2 |
| 1 | 2 | 3 |
| 1 | 4 | 2 |
| 1 | 3 | 3 |
| 1 | 1 | 2 |
| 2 | 0 | 2 |
| 1 | 1 | 2 |
| 2 | 1 | 3 |
| 1 | 1 | 1 |
| 2 | 0 | 2 |
| 2 | 2 | 1 |
| 2 | 1 | 1 |
| 1 | 1 | 1 |
| 1 | 1 | 3 |
| 2 | 1 | 2 |
| 1 | 1 | 2 |
| 1 | 1 | 1 |
| 2 | 2 | 3 |
| 2 | 0 | 3 |
| 2 | 0 | 1 |
| 1 | 0 | 2 |
| 1 | 1 | 2 |
| 1 | 0 | 2 |
| 2 | 0 | 3 |
| 2 | 1 | 2 |
| 2 | 1 | 3 |
| 1 | 1 | 2 |
| 2 | 0 | 3 |
| 2 | 1 | 1 |
| 2 | 0 | 2 |
| 2 | 0 | 3 |
| 2 | 0 | 2 |
| 2 | 0 | 3 |
| 1 | 0 | 3 |
| 1 | 2 | 2 |
| 2 | 1 | 2 |
| 2 | 0 | 2 |
| 2 | 0 | 3 |
| 2 | 2 | 3 |
| 2 | 0 | 2 |
| 2 | 2 | 3 |
| 1 | 1 | 3 |
| 1 | 0 | 3 |
| 1 | 1 | 1 |
| 2 | 0 | 2 |
| 1 | 0 | 3 |
| 1 | 0 | 3 |
| 1 | 1 | 3 |
| 1 | 0 | 2 |
| 1 | 0 | 3 |
| 1 | 0 | 3 |

|   |   |   |
|---|---|---|
| 1 | 0 | 3 |
| 2 | 0 | 2 |
| 1 | 1 | 2 |
| 2 | 1 | 3 |
| 1 | 1 | 2 |
| 1 | 0 | 2 |
| 1 | 0 | 1 |
| 1 | 2 | 2 |
| 2 | 0 | 3 |
| 1 | 0 | 3 |
| 1 | 1 | 3 |
| 1 | 0 | 2 |
| 2 | 1 | 3 |
| 1 | 1 | 2 |
| 1 | 1 | 3 |
| 1 | 2 | 2 |
| 2 | 2 | 3 |
| 2 | 0 | 2 |
| 1 | 0 | 1 |
| 1 | 0 | 2 |
| 2 | 0 | 2 |
| 1 | 1 | 2 |
| 1 | 1 | 3 |
| 1 | 1 | 3 |
| 1 | 1 | 2 |
| 1 | 1 | 3 |
| 1 | 0 | 3 |
| 1 | 0 | 2 |
| 2 | 0 | 2 |
| 1 | 0 | 3 |
| 1 | 0 | 3 |
| 2 | 0 | 2 |
| 1 | 0 | 3 |
| 1 | 1 | 3 |
| 1 | 0 | 3 |
| 2 | 1 | 2 |
| 2 | 1 | 3 |
| 1 | 0 | 2 |
| 2 | 0 | 3 |
| 2 | 2 | 3 |
| 2 | 1 | 1 |
| 1 | 0 | 3 |
| 1 | 0 | 2 |
| 1 | 0 | 2 |
| 1 | 0 | 3 |
| 2 | 2 | 3 |
| 2 | 2 | 3 |
| 1 | 1 | 2 |
| 1 | 0 | 2 |
| 1 | 1 | 2 |
| 2 | 0 | 3 |
| 1 | 0 | 3 |
| 2 | 0 | 3 |
| 1 | 1 | 3 |

|   |   |   |
|---|---|---|
| 2 | 0 | 2 |
| 2 | 1 | 2 |
| 1 | 0 | 2 |
| 1 | 0 | 3 |
| 1 | 1 | 2 |
| 1 | 0 | 2 |
| 1 | 1 | 2 |
| 1 | 0 | 2 |
| 1 | 0 | 3 |
| 1 | 0 | 2 |
| 1 | 1 | 2 |
| 1 | 0 | 2 |
| 1 | 0 | 3 |
| 1 | 0 | 3 |
| 1 | 0 | 2 |
| 1 | 0 | 2 |
| 1 | 0 | 2 |
| 1 | 1 | 2 |
| 1 | 0 | 3 |
| 1 | 0 | 2 |
| 2 | 0 | 2 |
| 1 | 0 | 3 |
| 1 | 0 | 2 |
| 1 | 1 | 3 |
| 1 | 0 | 2 |
| 1 | 0 | 3 |
| 1 | 0 | 2 |
| 1 | 0 | 3 |
| 1 | 0 | 2 |
| 1 | 0 | 3 |
| 1 | 0 | 2 |
| 1 | 0 | 2 |
| 1 | 0 | 2 |
| 1 | 0 | 2 |
| 1 | 0 | 3 |
| 1 | 0 | 2 |
| 1 | 1 | 3 |
| 1 | 0 | 3 |
| 1 | 0 | 2 |
| 1 | 0 | 3 |
| 1 | 0 | 2 |
| 1 | 0 | 3 |
| 1 | 0 | 2 |
| 1 | 0 | 3 |
| 1 | 0 | 2 |
| 1 | 0 | 3 |
| 1 | 0 | 2 |
| 1 | 0 | 2 |
| 2 | 0 | 2 |
| 1 | 0 | 3 |
| 1 | 0 | 2 |
| 1 | 0 | 1 |
| 1 | 1 | 1 |

|   |   |   |
|---|---|---|
| 1 | 0 | 3 |
| 1 | 0 | 3 |
| 1 | 0 | 1 |
| 2 | 1 | 3 |
| 2 | 0 | 2 |
| 1 | 0 | 2 |
| 1 | 0 | 2 |
| 1 | 0 | 2 |
| 1 | 1 | 3 |
| 1 | 0 | 1 |
| 1 | 0 | 2 |
| 1 | 0 | 2 |
| 1 | 0 | 2 |
| 1 | 0 | 3 |
| 1 | 0 | 3 |
| 1 | 0 | 3 |
| 1 | 0 | 3 |
| 1 | 0 | 2 |
| 1 | 0 | 1 |
| 1 | 0 | 3 |



| 反应组生存时间  | 反应组状态死亡2 | 反应组影像学评分 | 反应组阳性淋巴结分组 | 分组 | 无反应组影像学评分 | 无反应组时间 | 状态 |
|----------|----------|----------|------------|----|-----------|--------|----|
| 0.5      | 1        | 1        | 1          | 3  | 1         | 106.5  | 1  |
| 15.63333 | 2        | 3        | 1          | 3  | 1         | 88.73  | 1  |
| 49.73333 | 2        | 2        | 1          | 3  | 1         | 84.8   | 1  |
| 45.73333 | 1        | 2        | 1          | 3  | 1         | 65.6   | 1  |
| 39.5     | 1        | 2        | 0          | 3  | 2         | 51.9   | 1  |
| 22.96667 | 1        | 3        | 4          | 3  | 2         | 42.53  | 2  |
| 42.6     | 2        | 2        | 0          | 3  | 2         | 51.47  | 1  |
| 59.23333 | 1        | 2        | 0          | 3  | 1         | 37.57  | 2  |
| 11.13333 | 2        | 2        | 4          | 3  | 1         | 74     | 1  |
| 14.76667 | 2        | 3        | 4          | 3  | 2         | 81.33  | 1  |
| 9        | 2        | 3        | 3          | 3  | 2         | 13.77  | 2  |
| 47.5     | 2        | 2        | 0          | 3  | 1         | 68.1   | 1  |
| 88.1     | 2        | 2        | 1          | 3  | 1         | 4.17   | 2  |
| 14.5     | 2        | 3        | 3          | 3  | 1         | 24.1   | 2  |
| 85.73333 | 1        | 2        | 0          | 3  | 2         | 27.57  | 2  |
| 20       | 2        | 2        | 2          | 3  | 3         | 6.47   | 2  |
| 23.66667 | 2        | 1        | 0          | 3  | 1         | 7.8    | 2  |
| 44.63333 | 2        | 1        | 2          | 3  | 2         | 18.33  | 2  |
| 18.3     | 2        | 1        | 4          | 3  | 2         | 17.7   | 2  |
| 59.96667 | 1        | 1        | 2          | 3  | 3         | 13.5   | 2  |
| 23.86667 | 2        | 2        | 4          | 3  | 2         | 46     | 2  |
| 22.5     | 2        | 2        | 3          | 3  | 1         | 68.5   | 2  |
| 13.3     | 1        | 1        | 2          | 3  | 1         | 24     | 2  |
| 54.03333 | 1        | 2        | 0          | 3  | 1         | 18     | 2  |
| 50       | 1        | 2        | 1          | 3  | 1         | 8.6    | 2  |
| 38.63333 | 2        | 2        | 1          | 3  | 3         | 10.17  | 2  |
| 20.13333 | 2        | 3        | 2          | 3  | 2         | 21.8   | 2  |
| 40.5     | 2        | 2        | 2          | 3  | 1         | 16.27  | 2  |
| 8.833333 | 2        | 3        | 3          | 3  | 1         | 74.87  | 2  |
| 40.36667 | 2        | 2        | 2          | 3  | 1         | 54.67  | 2  |
| 39.06667 | 1        | 1        | 2          | 3  | 1         | 21.5   | 2  |
| 30.1     | 2        | 2        | 3          | 3  | 1         | 12     | 2  |
| 15.9     | 2        | 2        | 1          | 3  | 2         | 7.97   | 2  |
| 33.36667 | 1        | 2        | 0          | 3  | 3         | 6.97   | 2  |
| 30.5     | 1        | 2        | 0          | 3  | 2         | 8.8    | 2  |
| 30       | 2        | 2        | 2          | 3  | 1         | 90.53  | 1  |
| 91.1     | 2        | 1        | 0          | 3  | 1         | 6      | 2  |
| 75.53333 | 1        | 1        | 1          | 3  | 2         | 86.5   | 1  |
| 61.26667 | 1        | 1        | 1          | 3  | 2         | 52     | 2  |
| 18.03333 | 2        | 2        | 0          | 3  | 1         | 84.8   | 1  |
| 59.66667 | 1        | 1        | 0          | 3  | 1         | 1.47   | 2  |
| 50       | 1        | 1        | 0          | 3  | 2         | 5.37   | 2  |
| 49       | 1        | 2        | 1          | 3  | 1         | 4.2    | 2  |
| 48.76667 | 1        | 1        | 2          | 3  | 2         | 7.5    | 2  |
| 49.6     | 1        | 1        | 0          | 3  | 2         | 49.43  | 2  |
| 47.03333 | 1        | 1        | 1          | 3  | 1         | 25.63  | 1  |
| 20.33333 | 2        | 1        | 0          | 3  | 2         | 77.13  | 1  |
| 44.3     | 1        | 1        | 0          | 3  | 2         | 18.5   | 2  |
| 20       | 2        | 3        | 0          | 3  | 2         | 38.1   | 2  |

|           |   |   |   |   |   |       |   |
|-----------|---|---|---|---|---|-------|---|
| 34. 56667 | 1 | 2 | 0 | 3 | 2 | 43.33 | 2 |
| 33. 13333 | 2 | 2 | 2 | 3 | 3 | 2.63  | 2 |
| 29.8      | 1 | 2 | 1 | 3 | 2 | 50.97 | 1 |
| 98. 13333 | 1 | 2 | 0 | 3 | 2 | 41.93 | 2 |
| 50.9      | 1 | 1 | 0 | 3 | 2 | 48    | 1 |
| 88. 56667 | 1 | 1 | 1 | 3 | 1 | 18.37 | 2 |
| 87. 33333 | 1 | 1 | 0 | 3 | 3 | 16    | 2 |
| 85. 83333 | 1 | 1 | 0 | 3 | 3 | 16.57 | 2 |
| 85.5      | 1 | 1 | 0 | 3 | 2 | 10.6  | 2 |
| 79. 93333 | 1 | 1 | 0 | 3 | 2 | 72.3  | 1 |
| 34.5      | 1 | 1 | 0 | 3 | 2 | 71.33 | 1 |
| 60.3      | 1 | 1 | 0 | 3 | 2 | 1.33  | 2 |
| 59. 03333 | 1 | 2 | 0 | 3 | 1 | 70.57 | 1 |
| 53. 06667 | 1 | 1 | 0 | 3 | 1 | 4     | 1 |
| 50. 53333 | 1 | 2 | 0 | 3 | 1 | 6     | 2 |
| 50. 53333 | 1 | 2 | 0 | 3 | 1 | 12.3  | 2 |
| 50. 26667 | 1 | 2 | 0 | 3 | 2 | 17.3  | 2 |
| 49. 66667 | 1 | 2 | 0 | 3 | 1 | 11.43 | 2 |
| 47.8      | 1 | 2 | 0 | 3 | 3 | 3.3   | 2 |
| 47. 13333 | 1 | 1 | 0 | 3 | 2 | 10.6  | 2 |
| 39. 96667 | 1 | 1 | 0 | 3 | 1 | 15.77 | 2 |
| 39.8      | 1 | 2 | 0 | 3 | 3 | 2.5   | 1 |
| 29. 93333 | 1 | 2 | 0 | 3 | 1 | 11.83 | 2 |
| 29.7      | 1 | 1 | 0 | 3 | 2 | 35.5  | 1 |
| 25.1      | 1 | 2 | 0 | 3 | 3 | 3.33  | 2 |
| 25. 13333 | 1 | 2 | 0 | 3 | 3 | 1.6   | 2 |
| 24. 46667 | 2 | 2 | 1 | 3 | 2 | 19    | 2 |
| 22. 33333 | 2 | 3 | 0 | 3 | 1 | 7.87  | 2 |
| 23. 33333 | 1 | 2 | 0 | 3 | 2 | 19.2  | 2 |
| 37.9      | 1 | 2 | 0 | 3 | 2 | 4.17  | 2 |
| 7.5       | 1 | 1 | 0 | 3 | 1 | 21    | 2 |
| 75.1      | 1 | 1 | 0 | 3 | 1 | 7.47  | 2 |
| 64. 06667 | 1 | 1 | 0 | 3 | 1 | 11.9  | 2 |
| 54. 36667 | 1 | 3 | 0 | 3 | 1 | 6.3   | 2 |
| 47.5      | 1 | 1 | 0 | 3 | 1 | 40.17 | 2 |
| 45.5      | 1 | 2 | 0 | 3 | 2 | 18.73 | 2 |
| 37. 33333 | 1 | 2 | 0 | 3 | 1 | 3.87  | 2 |
| 32        | 1 | 2 | 0 | 3 | 1 | 50.27 | 1 |
| 26. 93333 | 1 | 1 | 0 | 3 | 1 | 50.6  | 2 |
|           |   |   |   | 3 | 1 | 25.17 | 2 |
|           |   |   |   | 3 | 2 | 24.7  | 2 |
|           |   |   |   | 3 | 1 | 7.47  | 2 |
|           |   |   |   | 3 | 2 | 17.93 | 2 |
|           |   |   |   | 3 | 2 | 47.57 | 1 |
|           |   |   |   | 3 | 2 | 11.9  | 2 |
|           |   |   |   | 3 | 2 | 37.8  | 2 |
|           |   |   |   | 3 | 2 | 8.37  | 2 |
|           |   |   |   | 3 | 2 | 46.1  | 1 |
|           |   |   |   | 3 | 1 | 20.17 | 2 |
|           |   |   |   | 3 | 1 | 45.5  | 1 |
|           |   |   |   | 3 | 2 | 15.5  | 2 |
|           |   |   |   | 3 | 2 | 27.17 | 2 |
|           |   |   |   | 3 | 1 | 45.37 | 1 |
|           |   |   |   | 3 | 2 | 15.4  | 2 |

|   |   |       |   |
|---|---|-------|---|
| 3 | 1 | 2.8   | 2 |
| 3 | 2 | 6.43  | 2 |
| 3 | 2 | 22.53 | 2 |
| 3 | 2 | 27.83 | 2 |
| 3 | 1 | 34.9  | 1 |
| 3 | 1 | 34.7  | 1 |
| 3 | 2 | 33.77 | 1 |
| 3 | 3 | 8.5   | 2 |
| 3 | 2 | 3.17  | 2 |
| 3 | 2 | 10.3  | 1 |
| 3 | 2 | 7.1   | 2 |
| 3 | 2 | 30.3  | 1 |
| 3 | 2 | 29.9  | 1 |
| 3 | 2 | 29.4  | 1 |
| 3 | 2 | 20.2  | 2 |
| 3 | 2 | 5.23  | 2 |
| 3 | 1 | 24.47 | 1 |
| 3 | 2 | 23.3  | 1 |
| 3 | 2 | 102.5 | 1 |
| 3 | 2 | 98.1  | 1 |
| 3 | 1 | 11.6  | 2 |
| 3 | 1 | 94.4  | 1 |
| 3 | 1 | 87.9  | 1 |
| 3 | 1 | 13.8  | 2 |
| 3 | 1 | 76.67 | 2 |
| 3 | 1 | 75.4  | 1 |
| 3 | 3 | 12.5  | 2 |
| 3 | 2 | 4.4   | 2 |
| 3 | 2 | 72.3  | 2 |
| 3 | 2 | 61.63 | 2 |
| 3 | 2 | 71.33 | 2 |
| 3 | 1 | 38.93 | 2 |
| 3 | 2 | 68.97 | 2 |
| 3 | 3 | 13.37 | 2 |
| 3 | 1 | 60.3  | 1 |
| 3 | 1 | 63.47 | 1 |
| 3 | 1 | 13.93 | 2 |
| 3 | 1 | 53.03 | 1 |
| 3 | 1 | 51.1  | 1 |
| 3 | 2 | 6.1   | 2 |
| 3 | 1 | 47.77 | 1 |
| 3 | 1 | 46.9  | 1 |
| 3 | 1 | 43.83 | 1 |
| 3 | 2 | 22.17 | 2 |
| 3 | 1 | 39.37 | 1 |
| 3 | 1 | 38.27 | 1 |
| 3 | 2 | 25.9  | 1 |
| 3 | 1 | 14.67 | 2 |
| 3 | 3 | 13.3  | 2 |
| 3 | 1 | 95.43 | 1 |
| 3 | 1 | 94.17 | 1 |
| 3 | 1 | 79.87 | 1 |
| 3 | 1 | 72.4  | 1 |
| 3 | 1 | 67.83 | 1 |

|   |   |          |   |
|---|---|----------|---|
| 3 | 1 | 58.5     | 1 |
| 3 | 1 | 56.7     | 1 |
| 3 | 1 | 56.2     | 1 |
| 3 | 1 | 49.17    | 1 |
| 3 | 1 | 48.23    | 1 |
| 3 | 1 | 45.73    | 1 |
| 3 | 1 | 42.87    | 1 |
| 3 | 1 | 0.5      | 1 |
| 3 | 2 | 25.67    | 1 |
| 3 | 2 | 24.77    | 1 |
| 3 | 1 | 44.23    | 1 |
| 1 | 1 | 0.5      | 1 |
| 1 | 3 | 15.63333 | 2 |
| 1 | 2 | 49.73333 | 2 |
| 1 | 2 | 45.73333 | 1 |
| 1 | 2 | 39.5     | 1 |
| 1 | 3 | 22.96667 | 1 |
| 1 | 2 | 42.6     | 2 |
| 1 | 2 | 59.23333 | 1 |
| 1 | 2 | 11.13333 | 2 |
| 1 | 3 | 14.76667 | 2 |
| 1 | 3 | 9        | 2 |
| 1 | 2 | 47.5     | 2 |
| 1 | 2 | 88.1     | 2 |
| 1 | 3 | 14.5     | 2 |
| 1 | 2 | 85.73333 | 1 |
| 1 | 2 | 20       | 2 |
| 1 | 1 | 23.66667 | 2 |
| 1 | 1 | 44.63333 | 2 |
| 1 | 1 | 18.3     | 2 |
| 1 | 1 | 59.96667 | 1 |
| 1 | 2 | 23.86667 | 2 |
| 1 | 2 | 22.5     | 2 |
| 1 | 1 | 13.3     | 1 |
| 1 | 2 | 54.03333 | 1 |
| 1 | 2 | 50       | 1 |
| 1 | 2 | 38.63333 | 2 |
| 1 | 3 | 20.13333 | 2 |
| 1 | 2 | 40.5     | 2 |
| 1 | 3 | 8.833333 | 2 |
| 1 | 2 | 40.36667 | 2 |
| 1 | 1 | 39.06667 | 1 |
| 1 | 2 | 30.1     | 2 |
| 1 | 2 | 15.9     | 2 |
| 1 | 2 | 33.36667 | 1 |
| 1 | 2 | 30.5     | 1 |
| 1 | 2 | 30       | 2 |
| 1 | 1 | 91.1     | 2 |
| 1 | 1 | 75.53333 | 1 |
| 1 | 1 | 61.26667 | 1 |
| 1 | 2 | 18.03333 | 2 |
| 1 | 1 | 59.66667 | 1 |
| 1 | 1 | 50       | 1 |
| 1 | 2 | 49       | 1 |

|   |            |   |
|---|------------|---|
| 1 | 1 48.76667 | 1 |
| 1 | 1 49.6     | 1 |
| 1 | 1 47.03333 | 1 |
| 1 | 1 20.33333 | 2 |
| 1 | 1 44.3     | 1 |
| 1 | 3 20       | 2 |
| 1 | 2 34.56667 | 1 |
| 1 | 2 33.13333 | 2 |
| 1 | 2 29.8     | 1 |
| 1 | 2 98.13333 | 1 |
| 1 | 1 50.9     | 1 |
| 1 | 1 88.56667 | 1 |
| 1 | 1 87.33333 | 1 |
| 1 | 1 85.83333 | 1 |
| 1 | 1 85.5     | 1 |
| 1 | 1 79.93333 | 1 |
| 1 | 1 34.5     | 1 |
| 1 | 1 60.3     | 1 |
| 1 | 2 59.03333 | 1 |
| 1 | 1 53.06667 | 1 |
| 1 | 2 50.53333 | 1 |
| 1 | 2 50.53333 | 1 |
| 1 | 2 50.26667 | 1 |
| 1 | 2 49.66667 | 1 |
| 1 | 2 47.8     | 1 |
| 1 | 1 47.13333 | 1 |
| 1 | 1 39.96667 | 1 |
| 1 | 2 39.8     | 1 |
| 1 | 2 29.93333 | 1 |
| 1 | 1 29.7     | 1 |
| 1 | 2 25.1     | 1 |
| 1 | 2 25.13333 | 1 |
| 1 | 2 24.46667 | 2 |
| 1 | 3 22.33333 | 2 |
| 1 | 2 23.33333 | 1 |
| 1 | 2 37.9     | 1 |
| 1 | 1 7.5      | 1 |
| 1 | 1 75.1     | 1 |
| 1 | 1 64.06667 | 1 |
| 1 | 3 54.36667 | 1 |
| 1 | 1 47.5     | 1 |
| 1 | 2 45.5     | 1 |
| 1 | 2 37.33333 | 1 |
| 1 | 2 32       | 1 |
| 1 | 1 26.93333 | 1 |
| 2 | 1 52.06667 | 1 |
| 2 | 2 51.9     | 2 |
| 2 | 1 52.03333 | 1 |
| 2 | 1 51.96667 | 1 |
| 2 | 2 51.2     | 1 |
| 2 | 1 51.4     | 1 |
| 2 | 1 92.43333 | 1 |
| 2 | 1 35.7     | 2 |
| 2 | 3 43.5     | 1 |

|   |   |           |   |
|---|---|-----------|---|
| 2 | 1 | 35.9      | 2 |
| 2 | 1 | 5.766667  | 2 |
| 2 | 1 | 15.633333 | 2 |
| 2 | 3 | 16.333333 | 2 |
| 2 | 2 | 34.8      | 2 |
| 2 | 2 | 11.5      | 2 |
| 2 | 3 | 8         | 2 |
| 2 | 1 | 96.1      | 1 |
| 2 | 2 | 8.433333  | 2 |
| 2 | 3 | 2.6       | 2 |
| 2 | 3 | 5.533333  | 2 |
| 2 | 1 | 30.46667  | 2 |
| 2 | 2 | 16.2      | 2 |
| 2 | 1 | 85.5      | 1 |
| 2 | 3 | 14.9      | 2 |
| 2 | 1 | 82.83333  | 1 |
| 2 | 1 | 82.13333  | 1 |
| 2 | 2 | 50.93333  | 2 |
| 2 | 1 | 38.26667  | 2 |
| 2 | 2 | 70.1      | 1 |
| 2 | 1 | 67.4      | 2 |
| 2 | 1 | 65.03333  | 1 |
| 2 | 2 | 14.5      | 2 |
| 2 | 1 | 23.9      | 2 |
| 2 | 1 | 58.76667  | 1 |
| 2 | 2 | 15.56667  | 2 |
| 2 | 2 | 6.566667  | 2 |
| 2 | 1 | 20.46667  | 2 |
| 2 | 1 | 54.06667  | 1 |
| 2 | 1 | 49.83333  | 1 |
| 2 | 2 | 49.43333  | 1 |
| 2 | 2 | 32.2      | 2 |
| 2 | 1 | 48.3      | 1 |
| 2 | 1 | 48.5      | 1 |
| 2 | 1 | 22.96667  | 2 |
| 2 | 1 | 11.53333  | 2 |
| 2 | 2 | 10.56667  | 2 |
| 2 | 2 | 49.5      | 1 |
| 2 | 1 | 36.16667  | 2 |
| 2 | 3 | 13.83333  | 2 |
| 2 | 3 | 10.53333  | 2 |
| 2 | 1 | 27.66667  | 2 |
| 2 | 2 | 30.3      | 2 |
| 2 | 1 | 20.4      | 2 |
| 2 | 2 | 40.23333  | 1 |
| 2 | 2 | 37.86667  | 1 |
| 2 | 2 | 33.13333  | 2 |
| 2 | 1 | 37.5      | 1 |
| 2 | 2 | 37.2      | 1 |
| 2 | 2 | 34.86667  | 1 |
| 2 | 3 | 13.33333  | 2 |
| 2 | 1 | 23.8      | 1 |
| 2 | 1 | 23.56667  | 1 |
| 2 | 2 | 23.5      | 2 |

|   |   |          |   |
|---|---|----------|---|
| 2 | 2 | 16.4     | 2 |
| 2 | 1 | 67.33333 | 2 |
| 2 | 1 | 87.93333 | 1 |
| 2 | 1 | 83.13333 | 1 |
| 2 | 1 | 80.63333 | 1 |
| 2 | 1 | 66.8     | 2 |
| 2 | 1 | 1.433333 | 2 |
| 2 | 1 | 76.6     | 1 |
| 2 | 1 | 42.26667 | 2 |
| 2 | 2 | 23.8     | 1 |
| 2 | 1 | 29.4     | 2 |
| 2 | 1 | 25.2     | 2 |
| 2 | 2 | 69.2     | 1 |
| 2 | 1 | 69.16667 | 1 |
| 2 | 2 | 32.63333 | 2 |
| 2 | 3 | 19.13333 | 2 |
| 2 | 2 | 24.2     | 2 |
| 2 | 1 | 60.76667 | 1 |
| 2 | 1 | 59.7     | 1 |
| 2 | 1 | 58.23333 | 1 |
| 2 | 1 | 57.4     | 1 |
| 2 | 2 | 57.4     | 1 |
| 2 | 2 | 57.96667 | 1 |
| 2 | 1 | 24.26667 | 2 |
| 2 | 2 | 54.2     | 1 |
| 2 | 2 | 53.83333 | 1 |
| 2 | 1 | 54.6     | 1 |
| 2 | 2 | 54       | 1 |
| 2 | 1 | 15.93333 | 2 |
| 2 | 1 | 51.06667 | 1 |
| 2 | 2 | 35.66667 | 2 |
| 2 | 2 | 49.1     | 1 |
| 2 | 2 | 31.6     | 2 |
| 2 | 3 | 7.033333 | 2 |
| 2 | 1 | 47.36667 | 1 |
| 2 | 2 | 46.23333 | 1 |
| 2 | 1 | 45.86667 | 1 |
| 2 | 1 | 45.9     | 1 |
| 2 | 2 | 44.7     | 1 |
| 2 | 1 | 44.73333 | 1 |
| 2 | 1 | 27       | 2 |
| 2 | 2 | 41.13333 | 1 |
| 2 | 1 | 41.03333 | 1 |
| 2 | 3 | 12.96667 | 2 |
| 2 | 2 | 31.36667 | 2 |
| 2 | 2 | 5.566667 | 2 |
| 2 | 2 | 37.73333 | 1 |
| 2 | 2 | 34.33333 | 1 |
| 2 | 2 | 30.8     | 2 |
| 2 | 1 | 30.8     | 1 |
| 2 | 2 | 30.6     | 1 |
| 2 | 2 | 26.03333 | 2 |
| 2 | 2 | 22.23333 | 2 |
| 2 | 2 | 25.36667 | 1 |

|   |   |          |   |
|---|---|----------|---|
| 2 | 1 | 85.16667 | 1 |
| 2 | 1 | 72.73333 | 1 |
| 2 | 1 | 71.86667 | 1 |
| 2 | 2 | 59.5     | 1 |
| 2 | 1 | 59.03333 | 2 |
| 2 | 1 | 57.53333 | 1 |
| 2 | 2 | 56.46667 | 1 |
| 2 | 2 | 52.53333 | 1 |
| 2 | 1 | 49.63333 | 1 |
| 2 | 1 | 47.06667 | 1 |
| 2 | 1 | 44.8     | 1 |
| 2 | 2 | 43.56667 | 1 |
| 2 | 1 | 39.46667 | 1 |
| 2 | 2 | 12       | 1 |
| 2 | 2 | 33.9     | 1 |
| 2 | 3 | 10.73333 | 2 |
| 2 | 1 | 29.43333 | 1 |
| 2 | 2 | 23.43333 | 1 |
| 2 | 1 | 23.3     | 1 |
| 2 | 1 | 22.9     | 1 |
